# Supplementary material for: Study protocol for a national observational cohort investigating frailty, delirium and multimorbidity in older surgical patients: the third Sprint National Anaesthesia Project (SNAP 3)
Source: PubMed Central journal article supplement — BMJ Open. 2023 Dec 21;13(12):e076803. doi: 10.1136/bmjopen-2023-076803 (PMC10748966; doi:10.1136/bmjopen-2023-076803), 2023-12-21
Supplement: bmjopen-2023-076803supp001.pdf [file bmjopen-2023-076803supp001.pdf]

## Appendix 1: SNAP 3 Examples of Included and Excluded Procedures

This list contains examples of included and excluded procedures for SNAP 3. We hope that it will be useful when making decisions regarding whether a participant should be approached for the study. It is not designed to be comprehensive, most surgical procedures are included. We have tried to not include the very minor procedures but it is challenging to know where to draw the line. We hope this guidance is useful.

### Ophthalmology

| Include                                                                           | Exclude                                                           |
|-----------------------------------------------------------------------------------|-------------------------------------------------------------------|
| Corneal grafts                                                                    | Any procedure under topical anaesthesia                           |
| Scleral buckle                                                                    | LASER (cornea, medical retina)                                    |
| Eyelid reconstruction                                                             | Adnexal (eyelid surgery inc. ptosis, blepharoplasty)              |
| Keratoplasty                                                                      | Removal of oil from vitreous body                                 |
| Excision of scalp/skin lesions <b>if require a split skin graft (SSG) or flap</b> | Excision of scalp/skin lesions <b>not requiring a SSG or flap</b> |
| Vitreoretinal surgery                                                             | Superficial eye lid surgery                                       |
| Strabismus surgery                                                                | Vitreotomy using pars plana approach                              |
| Enucleation/eviscerations/orbital decompression                                   | Correction of entropion of lower eyelid                           |
| Radioactive plaque insertion & removal                                            | Dacryocystorhinostomy                                             |
| Tantalum markers                                                                  | Cataract surgery                                                  |
| Glaucoma surgery                                                                  | Removal of sutures                                                |
| Anterior orbitotomy                                                               | Needling                                                          |
| Trabeculectomy                                                                    | Preserflo microshunt & mitomycin-C                                |
| Retinal surgery anaesthesia                                                       | Cataract surgery (regardless of anaesthesia mode)                 |

### General Surgery

| Include                                                     | Exclude                                                             |
|-------------------------------------------------------------|---------------------------------------------------------------------|
| Inguinal hernia repair under local anaesthesia +/- sedation | Lymph node biopsy                                                   |
| VAC dressing change                                         | Simple dressing change                                              |
| Perianal excision of rectal polyp                           | Diagnostic and therapeutic endoscopy regardless of anaesthesia mode |
| EUA rectum                                                  |                                                                     |
| Manual evacuation                                           |                                                                     |
| Axillary clearance                                          |                                                                     |
| Oesophageal dilation/stenting                               |                                                                     |

**ENT**

| <b>Include</b>                                                                                                                                                                                                 | <b>Exclude</b>                                                                                                            |
|----------------------------------------------------------------------------------------------------------------------------------------------------------------------------------------------------------------|---------------------------------------------------------------------------------------------------------------------------|
| Excision of larger lesions e.g basal cell carcinoma (BCC)/squamous cell carcinoma (SCC) <b>e.g. requiring more than primary closure, SSG/flap.</b><br>NB. Mode of anaesthetic here does not influence decision | Excision of smaller BCC/SCC <b>e.g. no SSG/flap required.</b><br>NB. Mode of anaesthetic here does not influence decision |
| Microlaryngoscopy                                                                                                                                                                                              | Biopsy of tongue                                                                                                          |
| Minimally invasive parathyroidectomy                                                                                                                                                                           | Frenuloplasty                                                                                                             |
| Manipulation or examination under anaesthetic nose                                                                                                                                                             | Removal salivary tube                                                                                                     |
| Cervical lymph node biopsy if GA                                                                                                                                                                               | Tracheostomy insertion/change                                                                                             |
| Panendoscopy                                                                                                                                                                                                   | Grommets                                                                                                                  |
|                                                                                                                                                                                                                | Anaesthesia for diagnostic procedures                                                                                     |
|                                                                                                                                                                                                                | Tracheo-oesophageal puncture                                                                                              |
|                                                                                                                                                                                                                | Thyroplasties                                                                                                             |
|                                                                                                                                                                                                                | Tracheostomy insertion/change                                                                                             |

**Thoracics**

| <b>Include</b>                                                                                            | <b>Exclude</b>                                      |
|-----------------------------------------------------------------------------------------------------------|-----------------------------------------------------|
| Diagnostic bronchoscopy if with other procedure                                                           | Endobronchial ultrasound (EBUS)                     |
| Tracheal stenting                                                                                         | Diagnostic bronchoscopy alone                       |
| Rigid bronchoscopy                                                                                        | Diagnostic and therapeutic bronchoscopy/pleuroscopy |
| Mediastinoscopy                                                                                           | Chest drain as sole procedure                       |
| Video assisted thoracoscopic surgery (VATS)                                                               |                                                     |
| Endoscopic procedures performed ancillary to surgical procedure<br>o Bronchoscopy prior to lung resection |                                                     |

**Cardiac**

| <b>Include</b>                                                                              | <b>Exclude</b>                                        |
|---------------------------------------------------------------------------------------------|-------------------------------------------------------|
| Transcatheter aortic valve implantation (TAVI)                                              | Ablations                                             |
| Other minimally invasive valve replacement procedures carried out under general anaesthesia | PPM lead extractions                                  |
|                                                                                             | Angiography, percutaneous coronary intervention (PCI) |

|  |                                                                                       |
|--|---------------------------------------------------------------------------------------|
|  | Insertion of permanent pacemaker (PPM) / implantable cardioverter defibrillator (ICD) |
|  | Cardioversion                                                                         |
|  | Electrophysiology (diagnostic or therapeutic)                                         |
|  | Insertion of intra-aortic balloon pump (IABP)                                         |

### Hands

| Include | Exclude                                             |
|---------|-----------------------------------------------------|
|         | Carpal tunnel decompression under local anaesthetic |
|         | Dupuytren's palmar fasciectomy                      |
|         | Trigger finger release                              |
|         | Excision of hand lesion if small                    |

### Trauma & Orthopaedics Emergency Department

| Include                               | Exclude                                                       |
|---------------------------------------|---------------------------------------------------------------|
| Ulnar nerve transposition             | Aspiration of knee under local anaesthetic                    |
| Removal of metal work                 | Cheilectomy                                                   |
| Excision of olecranon bursa           | Trigger point injections                                      |
| Vertebroplasty                        | Therapeutic epidural injection                                |
| Trapeziectomy                         | Intra-articular joint injections                              |
| Knee replacement                      | Dupuytren's fasciectomy                                       |
| Osteotomy of any bone                 | MUA joint                                                     |
| Replacement of hip joint              | MUA fracture in ED                                            |
| Replacement of shoulder joint         | General anaesthesia/sedation for scanning/ICU management only |
| Small joint fusion                    | Post-arrest management                                        |
| Insertion K wire                      | Erector spinae catheters                                      |
| MUA fracture in theatre               | Joint injections                                              |
| Surgery for trauma                    | Joint aspiration                                              |
| MUA fractures/dislocations in theatre |                                                               |
| Joint washout                         |                                                               |

### Urology

| Include                                   | Exclude                                         |
|-------------------------------------------|-------------------------------------------------|
| Rigid cystoscopy                          | Flexible cystoscopy                             |
| Urethral dilatation                       | Circumcision under local anaesthetic            |
| Transurethral resection of bladder tumour | Standard circumcision under general anaesthetic |
| Transurethral resection of prostate       | Transperineal prostate biopsy                   |

|                                          |                                    |
|------------------------------------------|------------------------------------|
| Hydrocele under general anaesthetic      | Flexible ureteroscopy              |
| Laser fragmentation of stone             | Cystoscopy under local anaesthesia |
| Nephrostomy                              | Prostate brachytherapy             |
| TURP/TURBT                               |                                    |
| Rigid diagnostic/surveillance cystoscopy |                                    |
| Stent change                             |                                    |

### Vascular

| Include                             | Exclude                                |
|-------------------------------------|----------------------------------------|
| Fistula ligation and banding        | Varicose veins under local anaesthetic |
| Fistula creation                    |                                        |
| Endovascular aneurysm repair (EVAR) |                                        |

### Interventional Radiology

| Include         | Exclude                                               |
|-----------------|-------------------------------------------------------|
| EVAR            | CT guided biopsies                                    |
| Angioplasty     | IV access/line insertion                              |
| CT guided drain | Endoscopic retrograde cholangiopancreatography (ERCP) |

### Dental

| Include     | Exclude |
|-------------|---------|
| Extractions |         |

### Gynaecology

| Include                         | Exclude                                   |
|---------------------------------|-------------------------------------------|
| <b>Therapeutic</b> hysteroscopy | <b>Diagnostic</b> hysteroscopy +/- biopsy |
| Laparoscopic hysterectomy       | Hysteroscopy and smear                    |
| Cervical polypectomy            |                                           |

### Neurosurgery

| Include                                           | Exclude                          |
|---------------------------------------------------|----------------------------------|
| Sympathetic nerve stimulator insertion or removal | SNS battery or lead change       |
| Spinal cord stimulator insertion                  | SNS reprogramming                |
|                                                   | SCS trial if purely percutaneous |
