# Supplementary material for: Study protocol for a national observational cohort investigating frailty, delirium and multimorbidity in older surgical patients: the third Sprint National Anaesthesia Project (SNAP 3)
Source: PubMed Central journal article supplement — BMJ Open. 2023 Dec 21;13(12):e076803. doi: 10.1136/bmjopen-2023-076803 (PMC10748966; doi:10.1136/bmjopen-2023-076803), 2023-12-21
Supplement: bmjopen-2023-076803supp002.pdf [file bmjopen-2023-076803supp002.pdf]

## Appendix 2: SNAP 3 Case Report Form

Below are the questions used in REDCap for the SNAP 3 study. For brevity, previously published, validated tools have not been replicated in this document. References for tools used in the SNAP 3 study can be found in the reference list of our accompanying paper.

| 1.0 Participant details |                                                                                                                                                             |              |                  |          |       |
|-------------------------|-------------------------------------------------------------------------------------------------------------------------------------------------------------|--------------|------------------|----------|-------|
| 1.1                     | Which country is your hospital based in?                                                                                                                    | England      | Northern Ireland | Scotland | Wales |
| 1.2                     | Which hospital site are you completing this form for?                                                                                                       |              |                  |          |       |
| 1.3                     | Is the potential participant having surgery AND 60 years or above?                                                                                          | Yes          |                  | No       |       |
| 1.4                     | What is the planned date of surgery?                                                                                                                        |              |                  |          |       |
| 1.5                     | Does the potential participant have the capacity to consent?                                                                                                |              |                  |          |       |
| 1.6                     | Is there a consultee/Personal Legal Representative (PLR) to offer advice? This may be face to face or over the telephone.                                   | Yes          |                  | No       |       |
| 1.7                     | Is the participant's Consultee (England, Wales and Northern Ireland) or Personal Legal Representative (Scotland) available in person or over the telephone? | Yes          |                  | No       |       |
| 1.8                     | Participant first name                                                                                                                                      |              |                  |          |       |
| 1.9                     | Participant surname                                                                                                                                         |              |                  |          |       |
| 1.10                    | Participant date of birth                                                                                                                                   |              |                  |          |       |
| 1.11                    | Participant NHS/CHI/H&C number                                                                                                                              |              |                  |          |       |
| 1.12                    | Would the participant/Consultee/PLR be able to complete a survey at 4 months by email or telephone?                                                         | Yes by email | Yes by telephone | No       |       |
| 1.13                    | Email address                                                                                                                                               |              |                  |          |       |
| 1.14                    | Telephone number                                                                                                                                            |              |                  |          |       |

| <b>2.0 Frailty assessment</b>    |                                                                                         |                                                                                                                               |                                                                                                                                                       |                                                  |                                                                                                                                                                             |
|----------------------------------|-----------------------------------------------------------------------------------------|-------------------------------------------------------------------------------------------------------------------------------|-------------------------------------------------------------------------------------------------------------------------------------------------------|--------------------------------------------------|-----------------------------------------------------------------------------------------------------------------------------------------------------------------------------|
| 2.1                              | At any point during the participant's clinical pathway, were they assessed for frailty? | Yes                                                                                                                           |                                                                                                                                                       | No                                               |                                                                                                                                                                             |
| 2.2                              | Which frailty tool was used to assess the participant?                                  | Clinical Frailty Scale /Rockwood Frailty Scale                                                                                | Edmonton Frailty Scale (scored out of 17)                                                                                                             | Reported Edmonton Frail Scale (scored out of 18) | Groningen Frailty Indicator                                                                                                                                                 |
|                                  |                                                                                         | Gait Speed Test                                                                                                               | PRISMA-7                                                                                                                                              | Risk Analysis Index-C                            | Timed Up and Go (TUG) Test                                                                                                                                                  |
|                                  |                                                                                         | Electronic Frailty Index                                                                                                      | Hospital Risk Frailty Index                                                                                                                           | Grip Strength                                    | Comprehensive Geriatric Assessment                                                                                                                                          |
| 2.3                              | What was the result of the frailty tool?                                                |                                                                                                                               |                                                                                                                                                       |                                                  |                                                                                                                                                                             |
| 2.4                              | Clinical Frail Scale (as completed by the clinical or research team)                    | 1-9                                                                                                                           |                                                                                                                                                       |                                                  |                                                                                                                                                                             |
| 2.5                              | Reported Edmonton Frail Scale (as completed by the clinical or research team)           | 0-18                                                                                                                          |                                                                                                                                                       |                                                  |                                                                                                                                                                             |
| 2.6                              | Electronic frailty index                                                                | 0-36                                                                                                                          |                                                                                                                                                       |                                                  |                                                                                                                                                                             |
| <b>3.0 Demographics and ADLs</b> |                                                                                         |                                                                                                                               |                                                                                                                                                       |                                                  |                                                                                                                                                                             |
| 3.1                              | Postcode                                                                                |                                                                                                                               |                                                                                                                                                       |                                                  |                                                                                                                                                                             |
| 3.2                              | Ethnic group                                                                            | Census categories                                                                                                             |                                                                                                                                                       |                                                  |                                                                                                                                                                             |
| 3.3                              | Highest level of education                                                              | Degree level eg. degree, NVQ Level 4-5, Higher National Certificate, Higher National Diploma, BTEC Higher Level, professional | 2+ A levels/VCEs, 4+ AS Levels, Higher School Certificate, NVQ Level 3, Advanced GNVQ, City and Guilds Advanced Craft, BTEC National, Scottish Higher | Apprenticeship                                   | 5 or more O Levels (passes)/CEs (grade 1), School Certificate, 1 A Level, 2-3 AS Levels/VCEs, NVQ Level 2, Intermediate GNVQ, City and Guilds Craft, BTEC, Scottish Higher, |

|     |                     |                                                                                                                                            |                                                                                     |                                 |                                                       |
|-----|---------------------|--------------------------------------------------------------------------------------------------------------------------------------------|-------------------------------------------------------------------------------------|---------------------------------|-------------------------------------------------------|
|     |                     | qualifications (eg. teaching or nursing) or other equivalent higher education qualifications                                               | National Diploma, Scottish Higher National Certificate, SVQ level 4+) or equivalent |                                 | Scottish Advanced Higher or equivalent qualifications |
|     |                     | O levels/CSEs (any grade), Foundation Diploma, NVQ level 1, Foundation GNVQ, O grade, Scottish Standard Grade or equivalent qualifications | No formal qualifications                                                            | Don't know                      |                                                       |
| 3.4 | Biological sex      | Female                                                                                                                                     |                                                                                     | Male                            |                                                       |
| 3.5 | Weight              |                                                                                                                                            |                                                                                     |                                 |                                                       |
| 3.6 | Height              |                                                                                                                                            |                                                                                     |                                 |                                                       |
| 3.7 | BMI                 |                                                                                                                                            |                                                                                     |                                 |                                                       |
| 3.8 | Source of admission | Own home                                                                                                                                   | Sheltered housing, retirement complex                                               | Residential home                | Nursing home                                          |
|     |                     | Rehabilitation facility (inpatient community unit or care home with the purpose of short term rehabilitation)                              | Homeless                                                                            | Another secondary care hospital | Other, please specify                                 |

|                                    |                                                  |                                                                                                                                                         |                                                                                                                                                                                          |                                                                                                               |                         |
|------------------------------------|--------------------------------------------------|---------------------------------------------------------------------------------------------------------------------------------------------------------|------------------------------------------------------------------------------------------------------------------------------------------------------------------------------------------|---------------------------------------------------------------------------------------------------------------|-------------------------|
| 3.9                                | Help with activities of daily living (ADLs)      | No, the participant receives no help with ADLs or the participant has help for lifestyle reasons only (would easily be able to do the tasks if needed). | Needs help with any of the following: transportation, shopping, managing finances, shopping, meal preparation, house cleaning, managing communication with others, managing medications. | Needs help with any of the following: ambulating, feeding, dressing, personal hygiene, continence, toileting. |                         |
| <b>4.0 Preoperative assessment</b> |                                                  |                                                                                                                                                         |                                                                                                                                                                                          |                                                                                                               |                         |
| 4.1                                | How was the participant assessed preoperatively? | Nurse (or AHP) led assessment on day of surgery only                                                                                                    | Anaesthetist led assessment on day of surgery only                                                                                                                                       | Nurse (or AHP) led clinic                                                                                     | Anaesthetist led clinic |
|                                    |                                                  | Physician (non geriatrician) led clinic                                                                                                                 | Geriatrician led clinic                                                                                                                                                                  | MDT clinic                                                                                                    | Other                   |
|                                    |                                                  | None of the above                                                                                                                                       |                                                                                                                                                                                          |                                                                                                               |                         |
| 4.2                                | Urgency of surgery as per NCEPOD criteria        | Emergency                                                                                                                                               | Urgent                                                                                                                                                                                   | Expedited                                                                                                     | Planned                 |
| 4.3                                | Indication for surgery                           | Confirmed cancer                                                                                                                                        | Possible cancer e.g. surgery with the aim of diagnosing possible cancer                                                                                                                  | Non-cancer                                                                                                    |                         |
| 4.4                                |                                                  | ASA I                                                                                                                                                   | ASA II                                                                                                                                                                                   | ASA III                                                                                                       | ASA IV                  |

|            |                                                                                                                                               |                                                                                   |                                                                                                                                                              |                                                           |                            |
|------------|-----------------------------------------------------------------------------------------------------------------------------------------------|-----------------------------------------------------------------------------------|--------------------------------------------------------------------------------------------------------------------------------------------------------------|-----------------------------------------------------------|----------------------------|
|            | Which ASA score would you give the participant?                                                                                               | ASA V                                                                             |                                                                                                                                                              |                                                           |                            |
| 4.5        | Surgical Outcome Risk Tool (SORT) Version 2 (including procedure type and surgical speciality, as completed by the clinical or research team) |                                                                                   |                                                                                                                                                              |                                                           |                            |
|            |                                                                                                                                               |                                                                                   |                                                                                                                                                              |                                                           |                            |
| <b>5.0</b> | <b>Comorbidities</b>                                                                                                                          |                                                                                   |                                                                                                                                                              |                                                           |                            |
| 5.1        | Does the participant have any of the following comorbidities?                                                                                 | MI (history of MI based on patient history, notes, history of stent               | Heart failure (dyspnoea that has responded to heart failure treatment)                                                                                       | AF (paroxysmal/permanent AF, not if successfully ablated) | Valvular heart disease     |
|            |                                                                                                                                               | Hypertension (even if treated, do not include those with one isolated episode)    | Peripheral vascular disease (treated and untreated)                                                                                                          | COPD (probable clinical diagnosis)                        | Other chronic lung disease |
|            |                                                                                                                                               | OSA/obesity hypoventilation syndrome (symptomatic, not purely positive STOP-BANG) | Cerebrovascular disease with mild or no residual symptoms (includes TIA, intracerebral/subarachnoid haemorrhage and stroke diagnosed on CT with no symptoms) | Hemiplegia or paraplegia (from any cause)                 | Dementia                   |
|            |                                                                                                                                               | Mild cognitive                                                                    | Anxiety or depression                                                                                                                                        | Parkinson's disease                                       | Diabetes (not just         |

|  |  |                                                                          |                                                     |                                                     |                                                                                                                                                                                                |
|--|--|--------------------------------------------------------------------------|-----------------------------------------------------|-----------------------------------------------------|------------------------------------------------------------------------------------------------------------------------------------------------------------------------------------------------|
|  |  | impairment                                                               | (on treatment)                                      | or parkinsonism                                     | impaired glucose tolerance or if in remission)                                                                                                                                                 |
|  |  | Moderate or severe renal disease (acute or chronic, stage 3A+, eGFR< 60) | Benign prostatic hypertrophy (can be self reported) | Liver disease (with or without portal hypertension) | Peptic ulcer disease (even if treated and not symptomatic)                                                                                                                                     |
|  |  | Malignancy                                                               | Lymphoma (of any type, acute or chronic)            | Leukaemia (of any type, acute or chronic)           | Connective tissue/rheumatological disease (systemic lupus erythematosus, polymyositis, mixed connective tissue disease, polymyalgia rheumatica, psoriatic arthropathy or rheumatoid arthritis) |

|     |                                                                 |                                                  |      |                                                                                                         |                                                  |
|-----|-----------------------------------------------------------------|--------------------------------------------------|------|---------------------------------------------------------------------------------------------------------|--------------------------------------------------|
|     |                                                                 | Osteoarthritis (include self reported)           | AIDS | Hearing impairment (uses hearing aids or struggles to manage a conversation at usual volumes of speech) | Visual impairment (registered partially sighted) |
| 5.2 | Does the participant have complications from their diabetes?    | Diabetes without chronic complication            |      | Diabetes with chronic complication                                                                      |                                                  |
| 5.3 | How severe is the participant's liver disease?                  | Mild liver disease (without portal hypertension) |      | Moderate or severe liver disease (with portal hypertension)                                             |                                                  |
| 5.4 | Which type(s) of malignancy does the participant have/has had?  | Any solid malignancy without metastases          |      | Metastatic solid tumour                                                                                 |                                                  |
| 5.5 | When was participant's malignancy/malignancies first diagnosed? | ≤ 5 years ago                                    |      | > 5 years ago                                                                                           |                                                  |
| 6.0 | Investigations within 12 weeks                                  |                                                  |      |                                                                                                         |                                                  |
| 6.1 | Haemoglobin g/L                                                 |                                                  |      |                                                                                                         |                                                  |
| 6.2 | White cell count 10 <sup>9</sup> /L                             |                                                  |      |                                                                                                         |                                                  |
| 6.3 | Neutrophil 10 <sup>9</sup> /L                                   |                                                  |      |                                                                                                         |                                                  |
| 6.4 | Lymphocyte 10 <sup>9</sup> /L                                   |                                                  |      |                                                                                                         |                                                  |
| 6.5 | Sodium mmol/L                                                   |                                                  |      |                                                                                                         |                                                  |
| 6.6 | Potassium mmol/L                                                |                                                  |      |                                                                                                         |                                                  |
| 6.7 | Creatinine micromol/L                                           |                                                  |      |                                                                                                         |                                                  |
| 6.8 | eGFR ml/min/1.73 <sup>2</sup>                                   |                                                  |      |                                                                                                         |                                                  |

|                      |                                                                                         |                                                          |                                                                                               |                                                            |                                                       |
|----------------------|-----------------------------------------------------------------------------------------|----------------------------------------------------------|-----------------------------------------------------------------------------------------------|------------------------------------------------------------|-------------------------------------------------------|
| 6.9                  | What is the participant's SARS-Cov-2 status preoperatively?                             | Tested positive or not tested and treated as positive    | Tested negative or not tested and treated as negative                                         | Don't know                                                 |                                                       |
| 7.0 Day of procedure |                                                                                         |                                                          |                                                                                               |                                                            |                                                       |
| 7.1                  | Date of operation                                                                       |                                                          |                                                                                               |                                                            |                                                       |
| 7.2                  | Type of anaesthesia                                                                     | General anaesthesia with volatiles                       | General anaesthesia with total intravenous anaesthesia (TIVA)                                 | Neuraxial                                                  | Regional                                              |
|                      |                                                                                         | Sedation                                                 | Local infiltration                                                                            | Don't know                                                 |                                                       |
| 7.3                  | Was the participant catheterised?                                                       | No                                                       | Long-term/pre-admission catheter                                                              | Electively catheterised pre/intra-op                       | Catheterised post-op                                  |
| 7.4                  | What level of care did the participant receive postoperatively (on the day of surgery)? | Ward (level 0 or 1 care, including day case units)       | Unplanned admission to PACU or equivalent (level 1.5 care)                                    | Unplanned admission to PACU or equivalent (level 2/3 care) | Unplanned critical care admission (level 2 or 3 care) |
|                      |                                                                                         | Planned admission to PACU or equivalent (level 1.5 care) | Planned admission to PACU or equivalent (level 2/3 care)                                      | Planned critical care admission (level 2 or 3 care)        | Don't know                                            |
| 7.5                  | Was the participant a day case patient who has been successfully discharged?            | Yes, they have been discharged on the day of surgery     | No, they are planned to be an inpatient OR they were intended to be day case but haven't been | Don't know                                                 |                                                       |



|     |                                                                                                             |          |                                  |          |  |
|-----|-------------------------------------------------------------------------------------------------------------|----------|----------------------------------|----------|--|
|     |                                                                                                             |          | discharged on the day of surgery |          |  |
|     |                                                                                                             |          |                                  |          |  |
| 8.0 | Day 3 follow up                                                                                             |          |                                  |          |  |
| 8.1 | Postoperative Morbidity Survey (general/cardiac/fractured neck of femur, as completed by the research team) |          |                                  |          |  |
| 8.2 | Documented new confusion or delirium                                                                        | Yes      | No                               |          |  |
| 8.3 | 4AT (if the participant isn't critically unwell, as completed by the clinical or research team)             | 0-12     |                                  |          |  |
| 8.4 | CAM-ICU (if the participant is critically unwell, as completed by the clinical or research team)            | Negative |                                  | Positive |  |
| 8.5 | Does the participant recall any symptoms of postoperative delirium or 'acute confusion'?                    | Yes      | No                               |          |  |
|     |                                                                                                             |          |                                  |          |  |
| 9.0 | Day 7 follow up                                                                                             |          |                                  |          |  |
| 9.1 | Postoperative Morbidity Survey (general/cardiac/fractured neck of femur, as completed by the research team) |          |                                  |          |  |
| 9.2 | Documented new confusion or delirium                                                                        | Yes      | No                               |          |  |
| 9.3 | 4AT (if the participant isn't critically unwell, as completed by the clinical or research team)             | 0-12     |                                  |          |  |
| 9.4 | CAM-ICU (if the participant is critically unwell, as completed by the clinical or research team)            | Negative |                                  | Positive |  |
| 9.5 | Does the participant recall any symptoms of                                                                 | Yes      | No                               |          |  |

|      |                                                                                                                                                                                                                                                                                                                                                                                                                                                                                                                                                                                                                                                                                                                                                                                                                                                                                                                                                                                                                                                                                                                                                                                                                                                                                                                                                                                                                                                                                                                                                                                                                                                                                |                                                               |                                   |            |  |
|------|--------------------------------------------------------------------------------------------------------------------------------------------------------------------------------------------------------------------------------------------------------------------------------------------------------------------------------------------------------------------------------------------------------------------------------------------------------------------------------------------------------------------------------------------------------------------------------------------------------------------------------------------------------------------------------------------------------------------------------------------------------------------------------------------------------------------------------------------------------------------------------------------------------------------------------------------------------------------------------------------------------------------------------------------------------------------------------------------------------------------------------------------------------------------------------------------------------------------------------------------------------------------------------------------------------------------------------------------------------------------------------------------------------------------------------------------------------------------------------------------------------------------------------------------------------------------------------------------------------------------------------------------------------------------------------|---------------------------------------------------------------|-----------------------------------|------------|--|
|      | postoperative delirium or 'acute confusion'?                                                                                                                                                                                                                                                                                                                                                                                                                                                                                                                                                                                                                                                                                                                                                                                                                                                                                                                                                                                                                                                                                                                                                                                                                                                                                                                                                                                                                                                                                                                                                                                                                                   |                                                               |                                   |            |  |
| 10.0 | <b>Delirium notes review</b>                                                                                                                                                                                                                                                                                                                                                                                                                                                                                                                                                                                                                                                                                                                                                                                                                                                                                                                                                                                                                                                                                                                                                                                                                                                                                                                                                                                                                                                                                                                                                                                                                                                   |                                                               |                                   |            |  |
|      | <p>SNAP 3 will use the validated 4AT and CAM-ICU to detect delirium in participants postoperatively. Due to its fluctuating nature, some participants will not be experiencing delirium at the time of their follow up even though they have had delirium. We would like to maximise the likelihood of detecting delirium by undertaking a notes review on day seven in addition to the validated assessment tools.</p> <p>The notes review will provide the study with an impression of whether or not a patient experienced delirium outside of the time of their delirium assessment. Based on existing literature, a notes review is more likely to detect delirium which occurs at night and hyperactive delirium, than a single assessment (such as CAM) alone. The diagnosis of delirium is often not clearly documented in patient's notes. Estimates of previously unrecognised delirium from retrospective notes are variable, ranging from 7-43%. Nursing notes are more likely than medical notes to document the presence of keywords indicating delirium.</p> <p>The use of DSM-V criteria expanded with words describing delirium have been selected based on previous literature and a priori knowledge. Please review the nursing and medical notes as below. Only record evidence from (up to and including) day seven postoperatively. If there is evidence of delirium occurring on day eight, then please do not report this. If you believe that you have identified a current diagnosis of unrecognised delirium from the notes then please pass these concerns to the clinical team. This is a requirement of good clinical and research practice.</p> |                                                               |                                   |            |  |
| 10.1 | If the participant has a diagnosis of delirium documented either using a validated tool or as free text documentation of 'delirium' or 'delirious', then please select 'Positive diagnosis of delirium'                                                                                                                                                                                                                                                                                                                                                                                                                                                                                                                                                                                                                                                                                                                                                                                                                                                                                                                                                                                                                                                                                                                                                                                                                                                                                                                                                                                                                                                                        | Positive diagnosis of delirium                                | No explicit diagnosis of delirium | Don't know |  |
|      | The following questions summarise the DSM-V criteria for the diagnosis of delirium and give examples of words frequently used to describe delirium in the clinical notes.                                                                                                                                                                                                                                                                                                                                                                                                                                                                                                                                                                                                                                                                                                                                                                                                                                                                                                                                                                                                                                                                                                                                                                                                                                                                                                                                                                                                                                                                                                      |                                                               |                                   |            |  |
| 10.2 | <u>DSM criteria A</u> : Is there any documentation of the following?<br>Inattention, inattentive, distractable<br>Muddled<br>Drowsy, drowsiness                                                                                                                                                                                                                                                                                                                                                                                                                                                                                                                                                                                                                                                                                                                                                                                                                                                                                                                                                                                                                                                                                                                                                                                                                                                                                                                                                                                                                                                                                                                                | Yes, phrases similar to the ones listed are used in the notes | No                                | Don't know |  |

|      |                                                                                                                                                                                                                                                                                                                                                                                                                                                                                                                       |                                                               |    |            |  |
|------|-----------------------------------------------------------------------------------------------------------------------------------------------------------------------------------------------------------------------------------------------------------------------------------------------------------------------------------------------------------------------------------------------------------------------------------------------------------------------------------------------------------------------|---------------------------------------------------------------|----|------------|--|
|      | Unrousable, unresponsive<br>Hypoactive<br>Agitated, agitation<br>Altered mental status<br>Inability to count from 20-1<br>Inability to recite months of the year backwards                                                                                                                                                                                                                                                                                                                                            |                                                               |    |            |  |
| 10.3 | <u>DSM criteria B</u> : Is there any documentation of the following?<br>Acute confusion<br>Fluctuating confusion<br>Fluctuation in severity throughout the day<br>Altered mental status, mental status change                                                                                                                                                                                                                                                                                                         | Yes, phrases similar to the ones listed are used in the notes | No | Don't know |  |
| 10.4 | <u>DSM criteria C</u> : Is there any documentation of the following?<br>Confused, confusion<br>Muddled<br>Hallucination, hallucinating<br>Reorientation, reorientated<br>Disorientation, disorientated,<br>Encephalopathy, encephalopathic,<br>Agitated, agitation<br>Inappropriate behaviour<br>Restless, unsettled<br>Aggressive<br>Wandering<br>Refusing observations/interventions<br>Uncooperative, not cooperating,<br>Pulling lines out<br>Combative<br>Speaking nonsense<br>Paranoid<br>MoCA < 24<br>AMTS < 7 | Yes, phrases similar to the ones listed are used in the notes | No | Don't know |  |

|      |                                                                                                                                                                                                                                                                                                                                                |                                                                                            |                                                                        |                     |  |
|------|------------------------------------------------------------------------------------------------------------------------------------------------------------------------------------------------------------------------------------------------------------------------------------------------------------------------------------------------|--------------------------------------------------------------------------------------------|------------------------------------------------------------------------|---------------------|--|
| 10.5 | <u>DSM criteria D1</u> : Is the participant functioning at their cognitive baseline?                                                                                                                                                                                                                                                           | Yes (they are at their neurocognitive baseline according to available sources of evidence) | No                                                                     | Don't know          |  |
| 10.6 | <u>DSM criteria D2</u> : If delirium is likely, could this disturbance be better explained by a severely reduced level of arousal or coma?<br><br><i>If suffering from delirium, are the participant's symptoms better explained by being severely obtunded, sedated or unconscious with a Richmond Agitation Sedation Scale of 4 or less?</i> | Yes                                                                                        | No                                                                     | Delirium not likely |  |
|      | Positive diagnosis of delirium from notes review either from:                                                                                                                                                                                                                                                                                  | Documented diagnosis of delirium in notes                                                  | DSM criteria responses:<br>Yes to 10.2, 10.3, 10.4<br>No to 10.5, 10.6 |                     |  |
| 11.0 | 4 month follow up                                                                                                                                                                                                                                                                                                                              |                                                                                            |                                                                        |                     |  |
| 11.1 | EQ-5D-5L                                                                                                                                                                                                                                                                                                                                       |                                                                                            |                                                                        |                     |  |
| 11.2 | EQ-VAS                                                                                                                                                                                                                                                                                                                                         | 0-100                                                                                      |                                                                        |                     |  |
| 11.3 | From when you had your operation, until 120 days after surgery, how many days have you spent in any hospital? Please include any hospital admissions (including your initial admission for surgery) and rehabilitation in hospitals. If you have                                                                                               |                                                                                            |                                                                        |                     |  |

|      |                                                                                                                                                                                                                                                                                                                                                     |  |
|------|-----------------------------------------------------------------------------------------------------------------------------------------------------------------------------------------------------------------------------------------------------------------------------------------------------------------------------------------------------|--|
|      | been out of hospital since the day of surgery and the surgery was day case then write '0'                                                                                                                                                                                                                                                           |  |
| 11.4 | From when you had your operation, until 120 days after surgery, how many days have you spent from home due to convalescing with family/friends/in residential homes. Don't include days spent socialising away from home or hospital admissions here. If you have been at home since the day of surgery and the surgery was day case then write '0' |  |
